Anesthesiology  
65:67-75, 1986

## *Clinical Pharmacology and Drug Therapy in the Burned Patient*

Jeevendra Martyn, M.D., F.F.A.R.C.S.\*

TRAUMA IS THE FOURTH leading cause of death in the United States and the leading cause of death in persons under the age of 38.<sup>1</sup> Burn trauma alone occurs in over two million Americans every year. Irrespective of type—electrical, chemical, scald, or flame—burns that exceed 10–15% of the total body surface area give rise to a cascade of systemic and localized physiologic responses.<sup>2,3</sup> Pathophysiologic changes accompanying burn trauma, which can alter the disposition of administered drugs, include cardiovascular changes,<sup>3–5</sup> alterations in renal and hepatic function,<sup>6,7</sup> and fluctuations in plasma protein concentrations.<sup>8–10</sup> This review summarizes current knowledge of the altered pharmacology of the burned patient.

### Pathophysiologic Changes Affecting Drug Kinetics

#### CARDIOVASCULAR FACTORS

The clinical course of the burned patient is marked by two distinct metabolic phases. In the acute (or resuscitative) phase, immediately after injury, blood flow to the organs and tissues is decreased.<sup>3,4</sup> Multiple factors, including hypovolemia, depressed myocardial function, increased blood viscosity, and the release of vasoactive substances, contribute to this decreased blood flow.<sup>3–5,11–13</sup> Therefore, during this period drugs administered by the enteral, subcutaneous, or intramuscular route will have delayed absorption with decreased peak concentrations and/or decreased bioavailability. If high dosages have been administered to overcome poor absorption, restoration of perfusion may lead to unexpectedly rapid uptake of medications from these sites, resulting in toxic effects.

Thus, small, repetitive doses of intravenous drugs generally are more effective during this initial phase.

The second phase of burn injury, the so-called hypermetabolic or recovery phase, is associated with increased blood flow to organs and tissues.<sup>3–7</sup> This phase begins at about 48 h after injury, provided that adequate resuscitation has been instituted. In the geriatric patient, this response is usually delayed or not present. Although total body and hepatic oxygen consumption as well as glucose and protein turnover by the liver are increased,<sup>6</sup> whether or not drug metabolism increases accordingly is unclear from the few clinical studies that have been performed. From a theoretic standpoint, these alterations in blood flow should affect the kinetics of flow-sensitive drugs.

#### PROTEIN-BINDING FACTORS

Plasma protein concentrations may be altered in both the resuscitative and recovery phases of burn injury.<sup>10</sup> Of note from a pharmacologic perspective, the albumin concentration is decreased, but the concentration of the acute phase reactant,  $\alpha_1$ -acid glycoprotein is increased.<sup>8</sup> Thus, the plasma binding of predominantly albumin-bound drugs, such as benzodiazepenes and antiepileptics, is decreased (increased free fraction),<sup>8,14</sup> while the binding of some other drugs, such as tricyclic antidepressants and neuromuscular relaxants, is increased (decreased free fraction).<sup>8,9</sup> Changes in drug binding due to these burn-induced changes in plasma protein concentrations can affect kinetics as well as plasma concentration–response curves.<sup>8,9,14–18</sup> The changes in protein binding may also result in alterations in the volume of distribution and clearance.<sup>15,16</sup> Increased binding will generally lead to a decreased volume of distribution while decreased binding will have opposite effects.<sup>14–16</sup> Relative to drug elimination, changes in protein binding affect only the clearance of low-extraction drugs. In the kidney, for example, increased binding will result in decreased elimination of glomerulus-filtered drugs, because only the free fraction is filtered, whereas decreased binding will lead to enhanced elimination. Similar directional changes can occur in the liver with respect to the clearance of low-extraction (binding-sensitive) drugs.<sup>16,17</sup> For example, burn-induced decreased plasma binding of phenytoin resulted not only in a larger distribution volume of drug but also more

\* Associate Professor of Anaesthesia, Harvard Medical School; Associate Anesthetist, Massachusetts General Hospital; and Associate Director of Anesthesia, Shriners Burns Institute.

Received from the Anesthesia Services of the Massachusetts General Hospital and the Shriners Burns Institute, and the Department of Anaesthesiology, Harvard Medical School, Boston, Massachusetts. Accepted for publication February 10, 1986. Supported in part by a grant from the Shriners Burns Institute and NIH GM 31569 and GM 21700.

Address reprint requests to Dr. Martyn: Department of Anesthesia, Massachusetts General Hospital, Boston, MA 02114.

Key words: Anesthesia; burns. Pharmacodynamics. Pharmacokinetics. Pharmacology.

rapid clearance.<sup>14</sup> Changes in plasma binding of drugs also complicate the interpretation of drug concentrations reported by the laboratory. Because most laboratories report total drug (free + bound) concentrations, it is difficult to know whether the reported concentration is therapeutic, subtherapeutic, or toxic.<sup>8,15,18</sup> In these situations reported total plasma concentrations of highly bound drugs should be interpreted with caution, and whenever possible, methodology for measuring free concentrations should be used.<sup>18</sup>

#### OTHER FACTORS

Sepsis, drugs that induce<sup>19</sup> or inhibit<sup>20</sup> drug metabolism; hepatotoxic or nephrotoxic drugs<sup>21</sup>; malnutrition<sup>22</sup>; parenteral nutrition<sup>23</sup>; preexisting systemic disease; and endogenous burn-induced substances<sup>11-13,24,25</sup> are factors that can complicate drug disposition and response. The onset and presence of hepatic, renal, and pulmonary dysfunction may confound matters even further. Yet the contribution of each of these factors to the altered pharmacology in the burned patient remains to be characterized.

#### Pharmacologic Studies in Burn Patients

##### ANTIBIOTICS—SYSTEMIC

Sepsis remains a common complication and cause of death in the burn patient, and antibiotics, singly or in combination, play an important role in therapy.<sup>3,21</sup> It is well established that generally higher than normal doses of certain antibiotics are required in burned patients to maintain adequate therapeutic levels.<sup>21,26</sup> The major reasons for the increased requirement include: 1) enhanced elimination of drugs *via* the kidney, resulting from burn-induced increases in the glomerular filtration rate<sup>21,24-27</sup>; and 2) drug loss through the burn wound.<sup>28</sup> For drugs that have minimal plasma-protein binding, the creatinine clearance may give an indirect estimate of the capacity of the burned patient to excrete antibiotic drugs by glomerular filtration. The elimination of half-life of tobramycin, which is directly correlated with creatinine clearance, exemplifies this hypothesis.<sup>27</sup>

Loss of drug through the burn wound may be more significant in the infant and child than the adolescent or adult because of their relatively high surface-area to body-weight ratio. Thus, intuitively, one would expect to find a direct correlation between burn body surface area and antibiotic clearance; however, no such relationship has been shown. Although loss of antibiotic through burn wound is significant, clinical experience in patients with renal failure suggests that this is not an important route of elimination, and antibiotic therapy has to be modified

in the presence of renal failure just as it has to be in non-burned patients.<sup>26,29</sup>

Clearly, systemic antibiotic administration in the burned patient is complex and deserves special consideration, including close monitoring of plasma drug concentrations. Because most antimicrobial agents bind little to plasma,<sup>30</sup> measured total drug concentrations will not be affected by alterations in protein concentrations.

##### ANTIBIOTICS—TOPICAL

The capacity of normal, intact skin to absorb therapeutic concentrations of drugs has been exploited extensively in the administration of drugs such as nitroglycerin. When the skin is destroyed, the capacity for topically applied drugs to be absorbed through the wound is often increased and can cause several adverse effects. For example, systemic effects on acid-base balance and ventilatory patterns of burned patients have been observed following the topical administration of mafenide acetate.<sup>31</sup> Peak blood levels of mafenide and its metabolite, p-carboxybenzidine sulfonamide, occur within 2 to 4 h of application.<sup>3</sup> Similarly, high serum concentrations of iodine have been observed following the topical application of povidone-iodine, and the amount of iodine absorbed has been shown to be directly related to the size of the burn.<sup>32</sup> Although there have been no reports of altered thyroid function following absorption of high levels of iodine, with impaired renal function plasma iodine concentrations may become toxic. The presence of unconjugated sulfonamide in blood, as well as leukopenia, has also been observed following the application of silver sulfadiazine.<sup>33</sup> Topical applications of silver nitrate can result in the absorption of large volumes of free water from dressings and loss of potassium, sodium, and calcium from the body, resulting in plasma fluid derangements.<sup>34,35</sup> Rarely, in the presence of aerobactercloacae, nitrate may be broken down to nitrite, which when absorbed into the blood stream leads to methemoglobinemia.<sup>3</sup> The blood in these instances appears cyanotic, but measured PaO<sub>2</sub> (not saturation) values will be normal because plasma oxygen tension is not affected. Methemoglobinemia is easily corrected by the administration of methylene blue 1-2 mg/kg iv.

##### ANTACIDS

Curling noted at post mortem the high incidence of stress ulcers in burned patients.<sup>36</sup> Acute erosions of the stomach and duodenum have been demonstrated in 86% of patients with major burns within 72 h after burn injury.<sup>37</sup> More than 40% of all patients with major burns have occult gastrointestinal bleeding in their gut, and some suffer life-threatening hemorrhage.<sup>37,38</sup> The mainstay of therapy for control of increased gastric acidity and bleeding includes early external feeding and the adminis-

tration of antacids and  $H_2$ -receptor antagonists.<sup>33</sup> Instituting early enteral feeding and oral antacids may be difficult in some patients because of intestinal ileus or perioperative fasting. Thus, parenterally administered antisecretory drugs, such as cimetidine, may be useful.

The efficacy of cimetidine in burned patients has been evaluated in several studies.<sup>38-42</sup> In adults given cimetidine in the first 18 h after burn, the number of oral antacid (Mylanta®) doses required to maintain gastric pH above 6 was significantly reduced. Between 18 and 42 h after burn, however, cimetidine was less effective.<sup>39</sup> Subsequent pharmacokinetic studies explained the reason for this phenomenon. During the early resuscitative phase of burn injury, urinary excretion was decreased and total cimetidine clearance was comparable with that in normal patients.<sup>42</sup> Thus, therapeutic concentrations were maintained normal. In the hyperdynamic phase of burn injury, total and renal cimetidine clearance were increased in direct proportion to the burn size, resulting in subtherapeutic plasma cimetidine levels.<sup>40</sup> Therefore, the usual adult dose of 5-6 mg/kg q 6 h should suffice for the first 24 h after burn. In the period that follows, however, to compensate for enhanced clearance, both the dosage and frequency of administration may have to be increased. As long as cimetidine concentrations are greater than 0.5  $\mu$ g/ml, gastric pH is likely to be greater than 4.0.<sup>40</sup> That is, target organ sensitivity is not changed. A dose of 400 mg q 4 h, or twice the normal 24-h dose, seems appropriate.<sup>41</sup>

The incidence of acute stress ulceration in children is approximately twice that of adults.<sup>43</sup> Although normal children tolerate and indeed require greater daily dosages of many drugs, including cimetidine, to achieve the same serum concentration or effect,<sup>44</sup> administration of higher dosages of cimetidine alone was not sufficient to maintain the gastric pH above 4.0 in a significant number of children.<sup>38</sup> Our preliminary studies have indicated that clearance rates of cimetidine in burned children are even higher than in burned adults.

The kinetic and dynamic behavior of ranitidine, a newer  $H_2$ -receptor blocker, has not been documented in burned patients.

#### ANXIOLYTICS

Anxiolytics and sedatives are commonly administered to burned patients. When diazepam is administered (usually intravenously), the therapeutic efficacy is short-lived due to the rapid decline of drug concentration in the plasma. This rapid decline in concentration following a single dose is due to the high lipid solubility of the drug and rapid uptake by the tissues.<sup>45</sup> Thus, although the elimination half-life of diazepam is long (36 h in normal patients, 72 h in burned patients),<sup>46</sup> the duration of action

of a single dose may be quite short.<sup>45</sup> This behavior is somewhat similar to the kinetics and dynamics of thiopental, where the elimination half-life is prolonged but the hypnotic effect is brief because of redistribution of drug in the tissues.<sup>47</sup> With repeated administrations of diazepam (or thiopental), however, the tissues can become saturated, and the termination of effect depends more on biotransformation by the hepatic enzymes, which can be quite depressed in the burned patient.<sup>46</sup>

Thus, it is not surprising that weaning patients from a respirator can be difficult if the patient has been sedated for long periods with repeated doses of diazepam or chlordiazepoxide (Librium®), another drug with prolonged half-life and high lipid solubility.<sup>45</sup> The metabolites of diazepam and chlordiazepoxide are also pharmacologically active and can prolong and potentiate the sedative effects of the parent compound. The impaired mental status observed in many burned patients long after the termination of these drugs may be related to these factors. We have observed high levels of the parent compound (after repeated diazepam administration) in patients as much as 2 weeks after the drug has been terminated. The active metabolites persisted for even longer periods.

The mechanism of the reduced hepatic clearance of diazepam following burns has not been established in humans. Diazepam metabolism, which occurs in the cytochrome p450 mixed oxidases, is said to be an oxidative metabolic (or phase I) reaction. Numerous structural and functional abnormalities occur with burn injury.<sup>48,49</sup> Inflammatory, neoplastic, infectious, and toxic diseases with hepatic or functional abnormalities, as well as the co-administration of other drugs, affect phase I reactions more than phase II (conjugation) reactions.<sup>45,50</sup> Thus, impaired diazepam metabolism may be due to a nonspecific impairment of the drug-metabolizing capacity of the liver, as has been shown for other disease states<sup>45,50</sup> and in several animal studies following burns.<sup>51,52</sup> Alternatively, it may be attributable to concomitant administration of other medications. Of particular importance is cimetidine, a known inhibitor of diazepam clearance.<sup>20</sup>

A newer benzodiazepene, lorazepam, possesses three important features that distinguish it from diazepam. First, lorazepam is metabolized by conjugation (a cytochrome p450-independent pathway) to a pharmacologically inactive glucuronide metabolite.<sup>45</sup> Second, the clearance of lorazepam is: 1) faster than that of diazepam<sup>45</sup>; 2) unimpaired in the burned population<sup>53</sup>; and 3) unaffected by concomitant cimetidine administration.<sup>54</sup> Third, the unbound volume of distribution of lorazepam is much less than that of diazepam, with clinically effective blood concentration persisting for many hours after the dose, resulting in profound, long-lasting sedation.<sup>45</sup> (In certain situations, this could be considered a disadvantage.) In summary, there is some theoretic basis for preferring lor-

azepam to diazepam, particularly when repeated doses are administered or when cimetidine therapy is required. These theoretic considerations need to be validated in clinical studies, particularly with reference to the pharmacodynamics.

Evidence from nonburned patients suggests that ranitidine does not affect the metabolism of either diazepam or lorazepam.<sup>55</sup> However, interaction of ranitidine with another benzodiazepene, midazolam, increases the soporific effects of the latter.<sup>56</sup>

### ANALGESICS

Despite the need for pain control, a major problem with burns, pain assessment and relief, have received scant attention.<sup>57,58</sup> The elimination of pain, particularly in those patients unable to communicate because they are too young to speak or who are being mechanically ventilated is difficult to assess. Concern about possible addiction or the inability of burned patients to eliminate administered drugs has led to undermedication.<sup>59,60</sup> Yet a nationwide survey of 151 burn centers and more than 10,000 hospitalized patients indicated no single case of iatrogenic addiction.<sup>58</sup> Inhalation of methoxyflurane (self-administered or otherwise), popular in the 1970s,<sup>61</sup> has been largely discontinued in burn centers because of the potential for nephrotoxicity due to the release of fluoride ions.<sup>62</sup>

Nitrous oxide-oxygen mixtures have been used for analgesia for quite some time, and the usefulness of the mixtures for hydrotherapy and debridement procedures has been tested.<sup>63,64</sup> These studies have documented that self-administered analgesic mixture of 50% nitrous oxide with oxygen (Dolono<sup>®</sup>, Entono<sup>®</sup>) is useful when combined with analgesics. This preparation produces analgesia approximately 20 s after the onset of inhalation and peaks at about 40 s to 2 min. Nitrous oxide is advantageous because it can be self administered, has minimal cardiovascular effects, and the duration of being NPO is decreased.<sup>64</sup>

Side effects of nitrous oxide that warrant consideration include excitability, particularly at higher concentrations, drowsiness, and inhibition of cell proliferation in bone marrow and neurologic disease.<sup>65,66</sup> Megaloblastic anemia and leukopenia can occur following exposure to nitrous oxide for 2–6 h.<sup>67</sup> Whether shorter duration but daily exposure to nitrous oxide during dressing changes and tubbing, especially in a burned patient who already has hematologic and immunologic abnormalities,<sup>68</sup> will potentiate these abnormalities sooner is unknown. Similarly, whether intermittent but frequent exposure of burned patients to nitrous oxide will worsen the already present neuromuscular disease<sup>69</sup> is subject to speculation. Finally, environmental contamination with N<sub>2</sub>O, may be of some

importance to pregnant employees because of the possible association between exposure to anesthetics and miscarriage.<sup>70</sup>

The use of narcotics, such as morphine, meperidine, and, more recently, fentanyl—administered intramuscularly or intravenously with or without sedatives—is the most common form of analgesic therapy for burned patients.<sup>58</sup> Although it has been known for some time that narcotic requirements are increased in burned patients,<sup>58,59</sup> whether this is due to pharmacokinetic or pharmacodynamic factors has not been completely characterized. In addition, activation of endogenous opioid pathways occurs during stress-induced analgesia in animals and humans and could alter responses to exogenous opioids.<sup>57,71</sup> One of the many reasons given for the reluctance to prescribe high dosages of narcotics for burned patients is the fear that these patients may be unable to handle the drugs safely because of their altered metabolic state. This concern has been addressed by Perry and Inturrisi, who found that the pharmacokinetics of morphine in burned patients were not significantly altered in comparison with normal controls.<sup>72</sup> The results of this study should be regarded as preliminary, since Perry and Inturrisi used a radioimmunoassay (RIA) that did not distinguish between the parent compound and its major, inactive metabolite, morphine glucuronide.<sup>73</sup> Additionally, this investigation used historical controls from a study performed 5 yr earlier at another institution.

Meperidine and other newer synthetic narcotics, such as fentanyl, have also been used extensively.<sup>58</sup> Dosages, comparative efficacies, and side effects in burned patients remain to be documented. The most undesirable side effect of the narcotics, especially the newer synthetic preparations, is the skeletal muscle rigidity they may produce.<sup>74</sup> Many studies in nonburned patients have recently assessed the value of self-administered or patient-controlled intravenous analgesic therapy,<sup>73,75</sup> which consists of self administration of small intravenous doses of narcotics by means of a triggered, programmable infusion pump to control pain. In order to avoid overdosage, the device only allows a maximum dose in a given time period. In these studies the authors found wide variability in dose requirements and kinetics. However, it was also noted that compared with conventional methods (intermittent iv, im or po), patient-controlled analgesia provided superior analgesic control. Because of large patient-to-patient variability in the pharmacokinetics and pharmacodynamics of drugs in burned patients, individualized (patient-controlled) dosage regimens may be preferable when treating pain. In view of the positive results observed in postoperative patients, the application of this technique in burned patients clearly deserves further study.

Recently, efforts have been made to understand the physiologic significance of the hypermetabolic (stress) re-

sponse to trauma and techniques to modify this response has been suggested.<sup>76,77</sup> The afferent responses to increased metabolism can be accentuated by the brain, particularly in the presence of pain and anxiety.<sup>2,78</sup> In this context, high-dose morphine and beta blockers have been shown to decrease the hypermetabolic response to trauma.<sup>78,79</sup> However, study in one patient indicates that single-dose spinal blockade does not alter energy metabolism.<sup>80</sup> In a preliminary study Demling reported that patients with persistently high levels of endorphins (and possibly catecholamines) developed sepsis. The question has been raised whether these substances might decrease oxygen delivery and cause the sepsis.<sup>77</sup> He further demonstrated that sedatives and opiate administration decreased endogenous opiate levels, and these patients did quite well. Although more studies are necessary, it appears that the administration of exogenous opiates is not harmful to burned patients.

#### ANESTHETICS

Although the clinical pharmacology of anesthetic drugs in the burned patient has received some attention, few data characterizing uptake, distribution, and elimination of these drugs are available.

The most extensively used intravenous anesthetic is ketamine.<sup>81-85</sup> The advantages of ketamine include: 1) its cardiovascular-stimulating properties, particularly useful in critically ill patients; 2) its intense postoperative analgesic effect; and 3) the ability to administer it intramuscularly.<sup>84</sup> Low-dose ketamine (1.5–2.0 mg/kg im) produces adequate amnesia and analgesia, with rapid reestablishment of activities such as eating.<sup>84,85</sup> Ketamine, 4–5 mg/kg im, can produce good operative conditions for eschar excisions.<sup>85</sup> The prolonged awakening associated with high doses of ketamine may be an advantage in the acutely burned patient, as it gives the nursing staff extra time to position and provide care for the freshly grafted wound areas before the patient awakens. Despite the cardiovascular-stimulating properties of ketamine, hypotension may occur in some critically ill patients. This is probably due to the inability of the already stimulated sympathetic nervous system to counterbalance the direct myocardial depressant and vasodilatory effects of ketamine.<sup>86</sup> The repeated use of ketamine results in tolerance<sup>86,87</sup>; thus, the dose should be titrated according to need.

Halothane continues to be the anesthetic of choice for burn patients in many burn units. In a review of 408 patients who received 1,770 halothane anesthetics, Gronert *et al.* reported that repeated administrations of halothane to burned patients involved no additional risk.<sup>88</sup> Our experience at the Shriners Burns Institute, with over 10,000 repeat anesthetics during the last 15 yr, confirms this. If

hepatitis attributable to halothane is mediated *via* an allergic response,<sup>89</sup> the anergic state of the burn patient<sup>90</sup> may perhaps be the reason for the absence of halothane-related hepatitis in this population. Of course, with the multiple complicating and confounding factors affecting the burn patient, it will always be difficult to pinpoint halothane or any other agent as *the* cause of hepatitis.

Although free fluoride ion is increased following enflurane anesthesia, the potential for toxicity is minor because, at least in normal patients, peak concentrations of fluoride never attain toxic levels.<sup>62</sup> The pharmacokinetic and pharmacodynamic advantages of isoflurane over other inhalational agents<sup>91,92</sup> remain to be confirmed in burned patients.

#### ADRENERGIC AGONISTS

Cardiovascular instability can occur in the acute phase of thermal injury and with sepsis.<sup>3,5</sup> Restoration of adequate hemodynamics, without producing volume overload, is the major goal of fluid (volume) resuscitation. In some instances, volume replacement alone is inadequate, and the use of adrenergic agonists has been advocated both during resuscitation and when complications such as sepsis occur. Aikawa *et al.* provided equivocal evidence for the efficacy of dopamine in treating decreased cardiac output in the early phase of thermal injury.<sup>4</sup> In a prospective study during burn resuscitation, dopamine 5–10  $\mu\text{g} \cdot \text{kg} \cdot \text{min}^{-1}$  produced no change in hemodynamic parameters.<sup>93</sup> In another study, dopamine (3–9  $\mu\text{g} \cdot \text{kg}^{-1} \cdot \text{min}^{-1}$ ) was used to correct right ventricular dysfunction occurring in the later phase of burn injury.<sup>94</sup> No significant improvement of right ventricular end-diastolic volume index, right ventricular ejection fraction, or systemic hemodynamics was observed; however, significant elevation in mean pulmonary artery pressures was noted, particularly in patients with mean pulmonary artery pressures elevated prior to infusion.<sup>95</sup> The ineffectiveness of dopamine in doses as high as 24  $\mu\text{g} \cdot \text{kg}^{-1} \cdot \text{min}^{-1}$  ( $\alpha$  effects) to improve systemic hemodynamics in sepsis has also received attention.<sup>94</sup> Thus, the clinical studies in burn trauma reported to date do not substantiate any useful  $\alpha$ - or  $\beta$ -adrenergic effects of dopamine. These findings are in contrast to studies performed in other surgical patients in whom infusions of dopamine produced significant improvement in cardiovascular dynamics.<sup>96</sup>

Burned patients normally have high levels of circulating catecholamines.<sup>79,97</sup> These levels are higher than those observed in other stress states<sup>98</sup> and, in the normal patient, result in significant changes in cardiovascular parameters.<sup>98,99</sup> Up to ten-fold higher than normal plasma concentrations of catecholamines have been observed in burned patients following topical applications of epinephrine to decrease bleeding during excision and grafting

procedures.<sup>100</sup> Although the authors drew attention to the potential for epinephrine to interact with halothane to cause arrhythmias, none were reported. In other studies, although plasma catecholamines were not measured, the absence of arrhythmias and minimal changes in cardiovascular parameters were noted following application of topical epinephrine during burn surgery.<sup>101,102</sup> This lack of responsiveness to  $\beta$ -receptor agonists may be related to the already present, burn-induced, high and continuous level of catecholamine stimulation,<sup>79,97,100</sup> leading to alterations in both receptor affinity and number (down regulation).<sup>103</sup>

Although numerous laboratory studies have documented advantages of such diverse agents as adrenergic agonists, verapamil, reserpine, nitroprusside, and digoxin to improve cardiovascular function,<sup>104-106</sup> systematic evaluation of these drugs at the bedside have not been performed. Vasodilator therapy with hydralazine may have some beneficial effects in patients in the early phase of burn injury.<sup>107</sup> A clinical study indicates that larger than normal doses of  $\beta$ -receptor antagonists may be required to completely block adrenergic responses.<sup>79</sup> This may be related to both high levels of circulating catecholamines and to increased plasma binding of propranolol following trauma and inflammation.<sup>8,108,109</sup>

#### ACETYLCHOLINE-RECEPTOR AGONISTS AND ANTAGONISTS

The response of the nicotinic acetylcholine receptors (neuromuscular junction) to agonist and antagonist drugs is altered as a consequence of burn trauma.<sup>110-117</sup> This subject has been reviewed recently.<sup>118</sup> Administration of succinylcholine, a depolarizing muscle relaxant that is structurally similar to acetylcholine, can induce a massive potassium release from the muscle cell that may result in a lethal hyperkalemia.<sup>110</sup> This hyperkalemic response is related to the dose of succinylcholine, time elapsed since injury, and severity of the burn injury.<sup>111</sup> In normal muscle, depolarization with succinylcholine (or acetylcholine) causes an increase in membrane permeability at discrete endplate junctions and the release of potassium from the cell. It is speculated that after burn injury, a denervation-like phenomenon occurs with a spreading of acetylcholine receptors throughout the muscle membrane.<sup>110</sup> Thus, the administration of succinylcholine causes potassium release from the entire muscle membrane rather than from discrete endplate junctions. Although catecholamines and the adrenergic nervous system play an important role in potassium homeostasis,<sup>119</sup> the importance of this system in the hyperkalemic response to succinylcholine has not been elucidated.<sup>120</sup> Indirect evidence suggests that the hyperkalemic response may last as long as 2 yr after the

burn occurs.<sup>112</sup> If the drug is administered inadvertently and cardiac arrest develops, calcium chloride should be administered in incremental doses until the peaked T-waves on the electrocardiogram return to normal. Although one might anticipate the hyperkalemia to reverse fairly rapidly with redistribution and tissue uptake of potassium, lethal hyperkalemia lasting more than 20 min has been reported.<sup>121</sup> Other therapeutic maneuvers include bicarbonate, glucose, and insulin. During this time, cardiopulmonary resuscitation should be instituted.

Numerous recent studies of nondepolarizing muscle relaxants show that burned patients have a decreased sensitivity to *d*-tubocurarine, metocurine, pancuronium, and atracurium.<sup>112-117</sup> To achieve a given level of paralysis, both the dose administered and serum concentration required in these patients are increased two- to three-fold. Altered pharmacokinetics and increased plasma protein binding of muscle relaxants contribute little and do not completely account for the augmented dose requirement.<sup>9,122</sup> However, an increase in acetylcholine receptor number just described may have occurred,<sup>110,123</sup> explaining the altered response to both agonist (succinylcholine)<sup>110,111</sup> and antagonist (curare-like) drugs.<sup>112-117</sup> Important factors contributing to changes in receptor number and response include immobilization and disuse atrophy.<sup>125,124</sup>

#### Conclusions

Multiple factors, including alterations in blood flow, plasma protein binding, and organ function can affect the pharmacokinetics of drugs administered after burn injury. This situation is confounded by the co-administration of drugs that can induce or inhibit the metabolism and excretion of other drugs. The pharmacology of this population is further complicated by changes in target-organ sensitivity induced by multiple endogenous substances released in response to, or as a consequence of, the burn injury, as well as from malnutrition, physical immobilization, and various iatrogenic factors. There is some evidence to indicate that the patient with minor burns (<15% body surface area) responds differently to a drug than the patient with major burns (>30%).<sup>38,114,115</sup> Although a number of studies have been conducted on the antibiotics and muscle relaxants, the mechanisms underlying the altered pharmacokinetics and pharmacodynamics of these agents in association with burn injury require more complete characterization. Further studies are needed to examine the relationship between particular drugs and the 1) type of burn injury (*e.g.*, scald *vs.* electrical *vs.* flame); 2) time elapsed since injury when the drug is administered, and 3) magnitude of the burn. Although additional research using animal models will undoubtedly

assist in defining the mechanisms responsible for these altered responses, clinical research in humans is urgently required.

If we are to improve the care of patients with burn and other traumatic injury, we must begin to conduct definitive clinical studies in these patients. Nutritional status and the effects of malnutrition appear to have important implications for the pharmacologic action and metabolism of drugs,<sup>22,23</sup> yet very little information is available concerning the combined effects of malnutrition, parenteral nutrition, and critical illness on the disposition and pharmacologic effect of drugs. With the current move to centralize trauma and burn care in many centers across the country, these studies should be forthcoming. Their need cannot be overemphasized.

The author thanks Drs. Daniel Carr, David Cullen, Robert Demling, and Chung Sook Kim for their comments and Ann Adams for editorial assistance.

### References

1. Levy RI, Moskowitz J: Cardiovascular research. Decades of progress, a decade of promise. *Science* 217:121-129, 1982
2. Demling RH: Burns. *N Engl J Med* 313:1389-1398, 1985
3. Moncreif JA: Burns. *N Engl J Med* 288:444-454, 1973
4. Aikawa N, Martyn JAJ, Burke JF: Pulmonary artery catheterization and thermolilution cardiac output determination in critical burn management. *Am J Surg* 135:811-817, 1978
5. Martyn JAJ, Snider MT, Szyfelbein SK, Burke JF, Laver MB: Right ventricular dysfunction following injury. *Ann Surg* 191:330-335, 1980
6. Wilmore DW, Goodwin CW, Aulick LH, Powand MC, Mason AD, Pruitt BA: Effect of injury and infection on visceral metabolism and circulation. *Ann Surg* 192:491-504, 1980
7. Goodwin CW, Aulick LH, Becker RA, Wilmore DW: Increased renal perfusion and kidney size in convalescent burn patients. *JAMA* 244:1588-1590, 1980
8. Martyn JAJ, Abernethy DR, Greenblatt DJ: Plasma protein binding of drugs after severe burn injury. *Clin Pharmacol Ther* 35:534-536, 1984
9. Leibel WS, Martyn JAJ, Szyfelbein SK, Miller KW: Elevated plasma binding cannot account for burn elevated *d*-tubocurarine hyposensitivity. *ANESTHESIOLOGY* 54:378-382, 1981
10. Daniels JC, Larson DL, Abston S, Ritzman BE: Serum protein profiles in thermal burns. I. Serum electrophoretic patterns, immunoglobulins and transport proteins. *J Trauma* 14:137-152, 1974
11. Morgan RJ, Martyn JAJ, Philbin DM, Coggins CH, Burke JF: Water metabolism and antidiuretic hormone response following thermal injury. *J Trauma* 20:468-472, 1980
12. Akrami C, Falkner B, Gould AB, DeClement FA, Bendlin A: Plasma renin and occurrence of hypertension in children with burn injuries. *J Trauma* 20:130-134, 1980
13. Harms BA, Bodai BI, Smith M, Gunther R, Flynn J, Demling RH: Prostaglandin release and altered microvascular integrity after burn injury. *J Surg Res* 31:274-280, 1981
14. Bowdle TA, Neal GD, Levy RH, Heimbach DM: Phenytoin pharmacokinetics in burned rats and plasma protein binding in burned patients. *J Pharmacol Exp Ther* 213:97-99, 1980
15. Greenblatt DJ, Koch-Weser J: Clinical pharmacokinetics. *N Engl J Med* 293:702-705, 964-976, 1980
16. Stanski DR, Watkins DW: Drug disposition in anesthesia. New York and London, Grune & Stratton, 1982, pp 1-48
17. Rowland M, Leitch D, Fleming G, Smith G: Protein binding and hepatic clearance with diazepam, a drug of high intrinsic clearance in the isolated perfused rat liver preparation. *J Pharmacokinet Biopharm* 12:129-147, 1984
18. Greenblatt DJ, Sellers EM, Koch-Weser J: Importance of protein binding for interpretation of serum or plasma concentrations. *J Clin Pharmacol* 22:259-263, 1982
19. Loft S, Boll J, Kyst A, Rasmussen B, Hansen SH, Dossing M: Increased hepatic microsomal activity after surgery under halothane or spinal anesthesia. *ANESTHESIOLOGY* 62:11-16, 1985
20. Klotz U, Riemann I: Delayed clearance of diazepam due to cimetidine. *N Engl J Med* 302:1012-1014, 1980
21. Sawchuk RJ, Rector TS: Drug kinetics in burn patients. *Clin Pharmacokinet* 5:548-556, 1980
22. Varma DR: Protein deficiency and drug interactions. *Drug Develop Res* 1:183-198, 1981
23. Hatchcock JN: Metabolic mechanisms of drug-nutrient interactions. *Fed Proc* 44:124-129, 1985
24. Harrison SD: Increased glomerular filtration in burned patients (correspondence). *N Engl J Med* 300:680, 1979
25. Golper TA: Increased glomerular filtration in burned patients (correspondence). *N Engl J Med* 300:680, 1979
26. Zaske DG, Dipolite RJ, Strate RJ: Gentamicin dosage requirements: Wide variation in 242 surgery patients with normal renal function. *Surgery* 87:164-169, 1980
27. Loirat P, Rohan J, Baillet A, Beaufils F, David R, Chapman A: Increased glomerular filtration rate in patients with major burns and its effect on pharmacokinetics of tobramycin. *N Engl J Med* 299:919, 1978
28. Glew RH, Moellering RC, Burke JF: Gentamicin dosage in children with extensive burns. *J Trauma* 16:819-823, 1976
29. Bennett WM, Muther RS, Parker RA, Keig P, Morrison G, Golper TA, Singer I: Drug therapy guidelines in renal failure: Dosing guidelines for adults. I. Antimicrobial agents and analgesics. *Ann Intern Med* 93:62-89, 1980
30. Gordon RC, Regamey C, Kirby WMM: Serum protein binding of aminoglycoside antibiotics. *Antimicrob Agents Chemother* 2:214-220, 1972
31. Petroff PA, Hander EW, Mason AD: Ventilatory patterns following burn injury and effect of sulfamylon. *J Trauma* 15:650-656, 1975
32. Notea E, Hirshowitz B: Comparison of blood serum iodine levels with the use of Iodex and Povidone iodide ointment. *J Trauma* 25:247-249, 1985
33. Munster A: The early management of thermal burns. *Surgery* 87:29-39, 1980
34. Burke JF, Bondoc CC, Morris PJ: Metabolic effects of topical silver nitrate therapy in burns covering more than fifteen percent of body surface. *Ann NY Acad Sci* 150:674-681, 1968
35. Szyfelbein SK, Drop LJ, Martyn JAJ: Persistent ionized hypocalcemia in patients during resuscitation and recovery phases in body burns. *Crit Care Med* 9:454-458, 1981
36. Curling TB: On acute ulceration of the duodenum in cases of burn. *Medic Chir Trans (London)* 25:260-281, 1841
37. Czaja AJ, McAlhany JC, Pruitt BA: Acute gastroduodenal disease after thermal injury: An endoscopic evaluation of incidence and natural history. *N Engl J Med* 29:925-929, 1976
38. Martyn JAJ: Cimetidine and/or antacid for the control of gastric acidity in pediatric burn patients. *Crit Care Med* 13:1-3, 1985

39. Watson WA, Russo J, Saffle JR, Schentag JJ, Warden GD: Cimetidine in the prophylaxis of stress ulceration in severely burned patients. *J Burn Care Rehab* 4:260-283, 1983
40. Martyn JAJ, Abernethy DR, Greenblatt DJ: Increased cimetidine clearance in burned patients. *JAMA* 258:1288-1291, 1985
41. McElwee HP, Sirinek KR, Levine BA: Cimetidine affords protection equal to antacids in the prevention of stress ulceration following burns. *Surgery* 86:620-626, 1979
42. Ziemink JA, Watson WA, Saffle JR, Smith IL, Russo J Jr, Warden GD, Schentag JJ: Cimetidine kinetics during resuscitation for burn shock. *Clin Pharmacol Ther* 36:228-233, 1984
43. Sevitt S: Duodenal and gastric ulceration after burning. *Br J Surg* 54:32-41, 1967
44. Goudsouzian NG, Cote CJ, Liu LMP, Diedrick DF: Dose-response effects of cimetidine on gastric pH and volume in children. *ANESTHESIOLOGY* 55:533-536, 1981
45. Greenblatt DJ, Shader RI, Abernethy DR: Current status of benzodiazepenes. *N Engl J Med* 309:354-416, 1983
46. Martyn JAJ, Greenblatt DJ, Quinby WC: Diazepam kinetics following burns. *Anesth Analg* 62:293-297, 1983
47. Burch PG, Stanski DR: The role of metabolism and protein binding in thiopental anesthesia. *ANESTHESIOLOGY* 58:146-152, 1983
48. Yisheng C, Ngao L, Jingquan S, Yuangpin L: Histopathological and ultrastructural changes in liver tissue from burned patients. *Burns* 11:408-418, 1985
49. Arturson G: Pathophysiological aspects of burn syndrome with special reference to liver injury and alterations of capillary permeability. *Acta Chir Scand [Suppl]* 274:5-121, 1961
50. Williams RL: Drug administration in hepatic disease. *N Engl J Med* 309:1616-1622, 1984
51. Ciaccio EI, Fruncillo RJ: Decreased aryl hydrocarbon hydroxylase after a 15% burn injury. *Biochem Pharm* 28:3151, 1979
52. Fruncillo RJ, DiGregorio CJ: The effect of thermal injury on drug metabolism in the rat. *J Trauma* 23:523-529, 1983
53. Martyn JAJ, Greenblatt DJ: Lorazepam conjugation unimpaired in burned patients (abstract). *ANESTHESIOLOGY* 63:A113, 1985
54. Abernethy DR, Greenblatt DJ, Ameer B, Shader RI: Differential effect of cimetidine on drug oxidation (antipyrine and diazepam) versus conjugation (acetaminophen and lorazepam). Prevention of acetaminophen toxicity by cimetidine. *J Pharmacol Exp Ther* 224:508-513, 1983
55. Abernethy DR, Greenblatt DJ, Eshelman FN, Shader RI: Ranitidine does not impair oxidative or conjugative drug metabolism: Noninteraction with antipyrine, diazepam, and lorazepam. *Clin Pharmacol Ther* 35:188-192, 1984
56. Kirch W, Hoensch H, Janish HD: Interactions and non-interactions with ranitidine. *Clin Pharmacokinet* 9:493-510, 1984
57. Szyfelbein SK, Osgood PF, Carr DB: The assessment of pain and plasma  $\beta$ -endorphin immunoreactivity in burned children. *Pain* 22:173-182, 1985
58. Perry S, Heidrich G: Management of pain during debridement survey in U. S. burn units. *Pain* 13:267-280, 1982
59. Perry S: Pain and anxiety in the burned child. *J Trauma* 24:S191-195, 1984
60. Heidrich G, Perry S, Amand R: Nursing staff attitudes about burn pain. *J Burn Care Rehabil* 2:259-261, 1981
61. Laird SM, Gray BM: Intermittent inhalation of methoxyflurane and trichlorethylene as analgesics in burn dressings. *Br J Anaesth* 43:149-159, 1971
62. Mazze RI: Fluorinated anesthetic nephrotoxicity: An update. *Can Anaesth Soc J* 31:3516-3522, 1984
63. Baskett PJF: Analgesia for dressings of burns in children: A method using neuroleptanalgesia and entonox. *Postgrad Med J* 48:138-142, 1972
64. Filkins SA, Cosgrove P, Marvin JA, Engrav LH, Heimbach DM: Self administered anesthetic: A method of pain control. *J Burn Care Rehab* 2:33-34, 1981
65. Parbrook GE: Leucopenic effects of prolonged exposure to nitrous oxide. *Br J Anaesth* 39:119-127, 1969
66. Brodsky JB, Cohen EN, Brown BW, Wu ML, Whitcher CE: Exposure to nitrous oxide and neurologic disease among dental professionals. *Anesth Analg* 60:297-301, 1981
67. Amos RJ, Amess JAL, Hinds CJ, Mollin DL: Incidence and pathogenesis of acute megaloblastic bone marrow change in patients receiving intensive care. *Lancet* 2:835-838, 1982
68. Altman LC, Furukawa CT, Klebanoff SJ: Depressed mononuclear leukocyte chemotaxis in thermally injured patients. *J Immunol* 119:199-205, 1977
69. Helm PA, Johnson ER, Careton AM: Peripheral neurological problems in acute burn patient. *Burns* 3:123-125, 1977
70. Buring JE, Hennekens CH, Mayrent SL, Rosner B, Greenberg ER, Colton T: Health experiences of operating room personnel. *ANESTHESIOLOGY* 62:325-330, 1985
71. Levine J: What are the functions of endorphins following thermal injury? *J Trauma* 24:S168-S172, 1984
72. Perry S, Inturrisi CE: Analgesia and morphine disposition in burn patients. *J Burn Care Rehab* 4:276-279, 1983
73. Dahlstrom B, Tamsen A, Paalzow L, Hartvig P: Patient controlled analgesic therapy. IV. Pharmacokinetics and analgesic concentrations of morphine. *Clin Pharmacokinet* 7:266-279, 1982
74. Hill AB, Nahrwold ML, DeRosayro AM, Knight PR, Jones RM, Bolles RE: Prevention of rigidity during fentanyl-oxygen induction of anesthesia. *ANESTHESIOLOGY* 55:452-454, 1981
75. Tamsen A, Hartvig P, Fagerlund C, Dahlstrom B: Patient controlled analgesic therapy. II. Individual analgesic demand and analgesic concentrations of pethidine in postoperative pain. *Clin Pharmacokinet* 7:164-175, 1982
76. Kehlet H: Should regional anesthesia and pharmacological agents such as beta blockers and opiates be utilized in modulating pain response? *J Trauma* 24:5177-5179, 1985
77. Demling RH: What are the functions of endorphins following thermal injury (discussion) *J Trauma (Suppl)* 24:S172-S176, 1984
78. Taylor JW, Hander EW, Skreen R, Wilmore DW: The effect of central nervous system narcosis on sympathetic response to stress. *J Surg Res* 20:313-320, 1976
79. Wilmore DW, Long JA, Mason AD, Skreen RW, Pruitt BA: Catecholamines: Mediator of hypermetabolic response to thermal injury. *Ann Surg* 180:653-668, 1974
80. Wilmore DW: Hormonal responses and their effect on metabolism. *Surg Clin North Am* 56:999-1018, 1976
81. Bjarnesen W, Corssen G: CI-581: A new nonbarbiturate short acting anesthetic for surgery in burns. *Mich Med* 66:177-181, 1967
82. Jarem BJ, Walker JA, Parks DH, Larson DL: Current practice of anesthesia for pediatric burns. *Anesthesiology Rev* 5:16-223, 1978
83. Corssen G, Dget S: Dissociative anesthesia for the severely burned child. *Anesth Analg* 50:95-102, 1971
84. Slogoff S, Allen GW, Wessels JV, Cheney DH: Clinical experience with subanesthetic ketamine. *Anesth Analg* 53:356-358, 1974
85. Demling RH, Ellerbee S, Jarrett F: Ketamine anesthesia for tangential excision of burn eschar: A burn unit procedure. *J Trauma* 18:267-270, 1978
86. White PF, Way WL, Trevor AJ: Ketamine—Its pharmacology and therapeutic uses. *ANESTHESIOLOGY* 56:119-136, 1982



87. Cote CJ, Petkan AJ: Thiopental requirements may be increased in children reanesthetized at least one year after recovery from extensive thermal injury. *Anesth Analg* 64:1156-1160, 1985
88. Gronert GA, Schaner PJ, Gunther RC: Multiple halothane anesthesia in burn patients. *JAMA* 205:878-880, 1968
89. Vergani D, Meli-Vergani G, Alberti A, Neuberger J, Eddleston BL, Davis M, Williams R: Antibodies to surface of halothane-altered rabbit hepatocytes in patients with severe halothane associated hepatitis. *N Engl J Med* 303:66-71, 1980
90. Nuri Ozkan A, Ninnemann JL: Circulating mediators in thermal injuries: Isolation and characterization of a burn injury-induced immunosuppressive, serum component. *J Burn Care Rehab* 6: 147-151, 1985
91. Baden JM, Rick SA: Metabolism and toxicity of inhaled anesthetics, Anesthesia. Edited by Miller RD. New York, Churchill-Lingstone, 1981, pp 383-424
92. Hickey RF, Eger EI: Circulatory pharmacology of inhaled anesthetics, Anesthesia. Edited by Miller RD. New York, Churchill-Lingstone, 1981, pp 331-345
93. Cone JB, Ransom JM, Tucker WE, Petrino RA, Bowser BH, Caldwell FT: Effect of dopamine on post burn myocardial depression. *J Trauma* 22:1019-1020, 1982
94. Drueck C, Welch GW, Pruitt BA: Hemodynamic analysis of septic shock in thermal injury: Treatment with dopamine. *Am Surg* 44:424-427, 1978
95. Martyn JAJ, Farago LS, Burke JF: Right ventricular and pulmonary hemodynamics of low dose dopamine in burned patients. *Chest* 89:357-360, 1986
96. Goldberg LI: Dopamine—Clinical uses of an endogenous catecholamine. *N Engl J Med* 291:707-710, 1974
97. Goodall McC: Sympatho-adrenal medullary response to thermal burn. *Ann NY Acad Sci* 150:685-689, 1968
98. Cryer PE: Physiology and pathophysiology of the human sympathoadrenal neuroendocrine system. *N Engl J Med* 303:436-444, 1980
99. Stratton JR, Pfeifer MA, Ritchie JL, Halter JB: Hemodynamic effects of epinephrine: Concentration study in humans. *J Appl Physiol* 58:1199-1206, 1985
100. Timonen RM, Pavlin GG, Haschke RH, Heimbach DM: Epinephrine level pre and post application of topical epinephrine during burn surgery (abstract). *ANESTHESIOLOGY* 57:A138, 1982
101. Snelling CFT, Shaw K: The effect of topical epinephrine hydrochloride in saline on blood loss following tangential excision of burn wounds. *Plast Reconstr Surg* 72:830-836, 1983
102. Glasson DW: Topical adrenalin as a hemostatic agent. *Plast Reconstr Surg* 74:451-452, 1984
103. Motulsky HJ, Insel PA: Adrenergic receptors in man. Direct identification of physiologic regulation and clinical alterations. *N Engl J Med* 307:18-29, 1982
104. Hilton J: Effects of verapamil on thermal trauma depressed cardiac output in the anesthetized dog. *Burns* 10:313-317, 1984
105. Fozzard HA: Myocardial injury in burn shock. *Ann Surg* 151: 113-119, 1961
106. Moncrief JA: Effect of various fluid regimens and pharmacologic agents on the circulatory hemodynamics of the immediate post burn period. *Ann Surg* 164:723-752, 1966
107. Pruitt BA, Mason AD, Moncrief JA: Hemodynamic changes in the early post burn period: The influence of fluid administration and a vasodilator (Hydralazine). *J Trauma* 11:36-46, 1971
108. Piafsky KM, Borga O, Odar-Cederlof I, Johanson C, Sjoquist F: Increased plasma protein binding of propranolol and chlorpromazine mediated by disease induced elevations of plasma  $\alpha_1$ -acid glycoprotein. *N Engl J Med* 299:1435-1439, 1978
109. Edwards DJ, Lalka D, Cerra F, Slaughter RL:  $\alpha_1$ -acid glycoprotein and protein binding in trauma. *Clin Pharmacol Ther* 31:62-67, 1982
110. Gronert GA, Theye RA: Pathophysiology of succinylcholine hyperkalemia. *ANESTHESIOLOGY* 43:89-99, 1975
111. Schaner PJ, Brown RL, Kirksey TD, Gunther RC, Richey CR, Gronert GA: Succinylcholine hyperkalemia in burned patients. *Anesth Analg* 48:764-769, 1969
112. Martyn JAJ, Matteo RS, Szyfelbein SK, Kaplan RF: Unprecedented resistance to neuromuscular blocking effects of metocurine with persistence after complete recovery in a burned patient. *Anesth Analg* 61:614-617, 1982
113. Martyn JAJ, Goudsouzian NG, Matteo RS, Liu LMP, Szyfelbein SK, Kaplan RF: Metocurine requirements in burned pediatric patients: Relation of plasma concentration to neuromuscular blockade. *Br J Anaesth* 55:263-268, 1983
114. Martyn JAJ, Liu LMP, Szyfelbein SK, Ambalavanar ES, Goudsouzian NG: Neuromuscular effects of pancuronium in burned children. *ANESTHESIOLOGY* 59:561-564, 1983
115. Satwicz PR, Martyn JAJ, Szyfelbein SK, Firestone S: Potentiation of neuromuscular blockade using a combination of pancuronium and dimethyltubocurarine. *Br J Anaesth* 56:479-484, 1984
116. Dwersteg JF, Pavlin EG, Heimbach D: Burn patients are resistant to atracurium (abstract). *ANESTHESIOLOGY* 63:A338, 1985
117. Mills A, Martyn JAJ, Szyfelbein SK: Evaluation of atracurium neuromuscular blockade in burned children (abstract). *ANESTHESIOLOGY* 63:A339, 1985
118. Martyn JAJ, Goldhill DR, Goudsouzian NG: Clinical pharmacology of muscle relaxants in burned patients. *J Clin Pharmacol* (in press)
119. Williams ME, Rosa RM, Silva P, Brown RS, Epstein FH: Impairment of extrarenal potassium disposal by  $\alpha$ -adrenergic stimulation. *N Engl J Med* 311:145-149, 1984
120. Nigrovic V: Succinylcholine, cholinceptors and catecholamines. *Can Anaesth Soc J* 31:382-394, 1984
121. Mazze RI, Dunbar RW: Intralingual succinylcholine administration in children: An alternative to intravenous and intramuscular routes. *Anesth Analg* 47:605-615, 1968
122. Martyn JAJ, Matteo RS, Lebowitz PW, Greenblatt DJ, Savarese JJ: Pharmacokinetics of *d*-tubocurarine in patients with thermal injury. *Anesth Analg* 61:241-246, 1982
123. Gronert GA: A possible mechanism for succinylcholine hyperkalemia. *ANESTHESIOLOGY* 53:356, 1980
124. Robbins N, Rischbach GD: Effect of chronic disuse of rat soleus neuromuscular junctions on presynaptic function. *J Neurophysiol* 34:570-578, 1971
125. Gronert GA, Matteo RS, Perkins S: Canine gastrocnemius disuse atrophy: Resistance to paralysis by demethyltubocurarine. *J Appl Physiol* 57:1502-1506, 1984
